# Supplementary material for: Xcr1+ type 1 conventional dendritic cells are essential mediators for atherosclerosis progression
Source: eLife. 2025 Sep 11;14:RP107742. doi: 10.7554/eLife.107742 (PMC12425476; doi:10.7554/eLife.107742)
Supplement: Supplementary file 1. [file elife-107742-supp1.xls]

## Sheet: supplementary table 1
[GeneSet]
$SchemaVersion	1
$GeneSetName	Seurat Marker Features RunID: ZEE2
$GeneSetDescription	Generated in the Seurat analysis pipeline. Fold-Change > 5.2605272115588; q-Val (FDR) &lt; 1
[Genes]	Log2 Fold-Change	q-Value	Cluster
Hspa1b	42.5212	9.5e-177	1
Dnajb1	20.8107	2.92e-90	1
Glrx	13.8383	3.45e-48	1
Hes1	10.5207	4.85e-44	1
Dnaja1	25.1384	2.68e-41	1
Hspd1	12.1502	7.64e-13	1
Lpar6	10.5663	1.18e-11	1
Cxcr4	13.5326	0.0078757	1
Cldnd1	33.5626	1	1
Sat1	16.0167	1	1
Stk17b	9.34188	1e-120	2
Gpr171	8.03698	6.9e-78	2
Cd36	37.3313	3.01e-59	2
Plekho2	9.67995	1.26e-51	2
Cd14	15.1184	1.73e-20	2
Smim3	9.35913	1.29e-10	2
Uck2	8.41274	1.12e-09	2
Rraga	8.27873	1.62e-06	2
Nsd1	8.1428	8.74e-06	2
Sgk1	9.19132	0.628752	2
Ccl5	Inf	0	3
Epsti1	106.99	0	3
AW112010	37.5598	0	3
Tspan3	29.083	0	3
Serpinb6b	43.0439	2.81e-211	3
Vim	63.2513	2.29e-95	3
Ccl22	178.667	6.38e-81	3
Tagln2	43.8152	9.66e-79	3
Resf1	28.4713	4.78e-63	3
Prdx1	34.1843	4.61e-36	3
Slfn5	33.1754	1.81e-130	4
Ifi44	11.0774	1.18e-80	4
Irf7	18.0397	4.53e-78	4
Stat1	11.1913	2.2e-70	4
Ly6a	71.7794	4.96e-35	4
Isg15	13.8187	1.38e-27	4
Myd88	13.023	1.08e-11	4
Ifitm3	10.6022	0.000403532	4
Nr4a2	12.6864	1	4
Eprs	32.6566	1	4
Ifrd1	13.1635	7.56e-128	5
Nlrp3	14.4512	2.01e-99	5
Tnfsf9	17.6632	1.68e-76	5
Gpr65	23.7563	3.36e-57	5
Itga4	14.4876	1.91e-53	5
Aff1	15.6279	6.96e-45	5
Lyz2	16.0004	5.23e-30	5
Chd7	13.0346	3.32e-27	5
Ccrl2	15.0381	6.89e-19	5
Anxa1	17.1352	0.000648149	5
Ube2c	34.3593	0	6
Tuba1b	33.6016	0	6
Hmgb2	21.9655	0	6
Arl6ip1	20.7915	0	6
Mki67	20.5277	0	6
Tubb5	14.2679	0	6
Cenpe	10.9824	0	6
Top2a	19.5976	2.19e-271	6
Cpox	12.4762	3.47e-21	6
Hsph1	23.519	1	6
Fabp5	22.3087	8.14e-283	7
2610528A11Rik	66.9018	1.03e-218	7
S100a4	21.2858	1.45e-149	7
Tmem123	69.9079	4.2e-133	7
Mt1	52.9879	4.91e-90	7
Gpr183	20.0373	3.03e-84	7
S100a6	25.5696	6.88e-76	7
Ctsc	23.6436	2.62e-46	7
Cdk2ap2	39.8101	9.71e-37	7
Clu	25.184	1.86e-20	7
Pcna	8.14282	5.22e-182	8
Mcm7	5.35802	3.65e-177	8
Mcm5	6.52807	7.55e-166	8
Lig1	6.68129	1.09e-157	8
Dut	5.26053	6.64e-133	8
Paics	6.75036	1.54e-111	8
Set	9.06441	3.85e-87	8
Stmn1	6.75355	8.71e-18	8
Tmem14c	7.07925	1.11e-11	8
Npm3	7.29581	1.78e-10	8
Nampt	14.016	5.52e-94	9
Serpina3g	21.0818	2.44e-40	9
Sqstm1	35.7108	2.69e-35	9
Nr4a3	46.8593	2.27e-30	9
Prkcd	14.5386	1.53e-28	9
Bcl2l11	16.4772	2.9e-18	9
Cd274	20.2894	4.91e-12	9
Ifi207	17.3354	1.81e-09	9
Cdkn1a	14.7383	6.97e-08	9
Gm19951	16.143	1.04e-06	9
Ets1	24.6866	1.25e-263	10
Il2rb	40.6013	3.11e-168	10
Nkg7	26.1746	5.46e-153	10
Xcl1	179.09	4.57e-147	10
Ighm	356.117	1.4e-138	10
Cd7	51.6506	4e-68	10
Nrgn	63.2297	6.64e-60	10
Igkc	Inf	1.11e-59	10
Ccnd2	22.7688	1.11e-11	10
Odc1	79.1178	1.83e-09	10
