# Supplementary material for: Xcr1+ type 1 conventional dendritic cells are essential mediators for atherosclerosis progression
Source: eLife. 2025 Sep 11;14:RP107742. doi: 10.7554/eLife.107742 (PMC12425476; doi:10.7554/eLife.107742)
Supplement: Supplementary file 2. [file elife-107742-supp2.xls]

## Sheet: Aorta vs Spleen
[GeneSet]
$SchemaVersion	1
$GeneSetName	up regulated genes in HFD-Aorta vs HFD-Spleen
$GeneSetDescription
[Genes]	fold_change(HFD-Aorta vs HFD-Spleen)	q-value(HFD-Aorta vs HFD-Spleen)	HFD-Aorta	HFD-Spleen
Ccr2	2.868	2.0818e-13	2.76471	0.312659
Cldnd1	2.09622	4.97922e-05	3.47059	1.13269
Ifi203	2.03954	0.000476302	1.57353	0.26182
Mndal	2.38451	4.02807e-08	2.36765	0.412303
2024-09-03	2.07201	2.25686e-07	4.97059	1.88155
Wfdc17	2.01749	0.0194669	1.17647	0.0788002
[GeneSet]
$SchemaVersion	1
$GeneSetName	up regulated genes in HFD-Aorta vs HFD-Lymph nodes
$GeneSetDescription
[Genes]	fold_change(HFD-Aorta vs HFD-Lymph nodes)	q-value(HFD-Aorta vs HFD-Lymph nodes)	HFD-Aorta	HFD-Lymph nodes
Ccr2	2.47261	2.08e-13	2.76471	0.522563
Cd24a	2.04889	1.39e-10	8.22059	3.50028
Ckb	2.43031	2.08e-13	4.20588	1.14206
Cldnd1	2.85069	2.08e-13	3.47059	0.568245
Cyth4	2.11238	2.08e-13	3.05882	0.921448
Dnaja1	3.22678	1.02e-10	6.73529	1.39721
Dnajb1	5.16719	2.48e-09	8.07353	0.755989
Fgfr1	2.25182	2.08e-13	1.54412	0.129805
Hsp90aa1	4.50681	3.09e-08	21.4412	3.97939
Hsp90ab1	2.13951	1.05e-05	29.0735	13.0563
Hspa1a	7.12033	2.08e-13	36.7794	4.30585
Hspa1b	9.11898	2.08e-13	38.6765	3.35098
Hspa5	2.68952	2.39e-08	23.0588	7.9454
Hspd1	2.33134	0.0275939	3.14706	0.77883
Hspe1	2.16981	1.12e-05	6.10294	2.27354
Hsph1	5.51596	1.1e-06	6.75	0.405014
Ifitm2	2.29707	1.85e-11	3.39706	0.914206
Ifitm3	2.23302	0.000253682	2.04412	0.363231
Lyz2	2.1711	2.08e-13	4.01471	1.30975
Naaa	2.25383	2.08e-13	19.1765	7.95209
Nr4a2	2.01215	0.0210806	2.58824	0.783287
Olfm1	2.03054	2.08e-13	4.23529	1.57827
Picalm	2.09067	8.77e-08	3.83824	1.31421
Plac8	2.56781	2.08e-13	4.88235	1.29081
Rac2	2.2199	2.08e-13	1.97059	0.338162
Rsrp1	2.13894	2.08e-13	3.35294	1.0351
2024-09-03	2.06936	2.08e-13	4.97059	1.88524
Tiparp	2.05071	0.00113877	2.22059	0.570474
Wfdc17	2.08139	6.31e-06	1.17647	0.0456825
Zfand2a	2.08069	0.040016	1.20588	0.0601671

## Sheet: Aorta vs Lymph nodes
[GeneSet]
$SchemaVersion	1
$GeneSetName	up regulated genes in HFD-Aorta vs HFD-Lymph nodes
$GeneSetDescription
[Genes]	fold_change(HFD-Aorta vs HFD-Lymph nodes)	q-value(HFD-Aorta vs HFD-Lymph nodes)	HFD-Aorta	HFD-Lymph nodes
Ccr2	2.47261	2.08e-13	2.76471	0.522563
Cd24a	2.04889	1.39e-10	8.22059	3.50028
Ckb	2.43031	2.08e-13	4.20588	1.14206
Cldnd1	2.85069	2.08e-13	3.47059	0.568245
Cyth4	2.11238	2.08e-13	3.05882	0.921448
Dnaja1	3.22678	1.02e-10	6.73529	1.39721
Dnajb1	5.16719	2.48e-09	8.07353	0.755989
Fgfr1	2.25182	2.08e-13	1.54412	0.129805
Hsp90aa1	4.50681	3.09e-08	21.4412	3.97939
Hsp90ab1	2.13951	1.05e-05	29.0735	13.0563
Hspa1a	7.12033	2.08e-13	36.7794	4.30585
Hspa1b	9.11898	2.08e-13	38.6765	3.35098
Hspa5	2.68952	2.39e-08	23.0588	7.9454
Hspd1	2.33134	0.0275939	3.14706	0.77883
Hspe1	2.16981	1.12e-05	6.10294	2.27354
Hsph1	5.51596	1.1e-06	6.75	0.405014
Ifitm2	2.29707	1.85e-11	3.39706	0.914206
Ifitm3	2.23302	0.000253682	2.04412	0.363231
Lyz2	2.1711	2.08e-13	4.01471	1.30975
Naaa	2.25383	2.08e-13	19.1765	7.95209
Nr4a2	2.01215	0.0210806	2.58824	0.783287
Olfm1	2.03054	2.08e-13	4.23529	1.57827
Picalm	2.09067	8.77e-08	3.83824	1.31421
Plac8	2.56781	2.08e-13	4.88235	1.29081
Rac2	2.2199	2.08e-13	1.97059	0.338162
Rsrp1	2.13894	2.08e-13	3.35294	1.0351
2024-09-03	2.06936	2.08e-13	4.97059	1.88524
Tiparp	2.05071	0.00113877	2.22059	0.570474
Wfdc17	2.08139	6.31e-06	1.17647	0.0456825
Zfand2a	2.08069	0.040016	1.20588	0.0601671
