# Supplementary material for: Xcr1+ type 1 conventional dendritic cells are essential mediators for atherosclerosis progression
Source: eLife. 2025 Sep 11;14:RP107742. doi: 10.7554/eLife.107742 (PMC12425476; doi:10.7554/eLife.107742)
Supplement: Supplementary file 3. [file elife-107742-supp3.xlsx]

## Sheet: Table 1
sgRNA
sgRNA name	sequence (5’ > 3’)	Purpose
sgXcr1-KI	AGGCTGTAGAGGACTCCATC TGG	Generation of Xcr1Cre-Gfp knock-in mice
sgXcl1-1	TTGCGAGGGGCTTTCGGGGT GGG	Generation of Xcl1 knockout mice
sgXcl1-2	CAAGCTGAACTTAAGAACGA TGG
